Corresponding authors:

Dana N Mitzel  
USDA, Agricultural Research Service  
Center for Grain and Animal Health Research  
1515 College Ave.  
Manhattan, KS 66502  
(785)-537-5540  
[dana.mitzel@usda.gov](mailto:dana.mitzel@usda.gov)

Juergen A. Richt  
Kansas State University  
College of Veterinary Medicine  
1800 Denison Ave  
Manhattan, KS, 66506  
(785) -532-2793  
[jricht@ksu.edu](mailto:jricht@ksu.edu)

## **Susceptibility of midge and mosquito vectors to SARS-CoV-2 by natural route of infection**

Velmurugan Balaraman<sup>a</sup>, Barbara S. Drolet<sup>b</sup>, Natasha N Gaudreault<sup>a</sup>, William C. Wilson<sup>b</sup>, Jeana Owens<sup>b</sup>, Dashzeveg Bold<sup>a</sup>, Dustin A. Swanson<sup>b</sup>, Dane C. Jasperson<sup>b</sup>, Leela E. Noronha<sup>b</sup>, Juergen A. Richt<sup>a\*</sup>, Dana N Mitzel<sup>b\*</sup>

<sup>a</sup>Department of Diagnostic Medicine/Pathobiology and Center of Excellence for Emerging and Zoonotic Animal Diseases, College of Veterinary Medicine, Kansas State University, 1800 Denison Ave, Manhattan, Kansas, 66506, United States of America.

<sup>b</sup>United States Department of Agriculture, Agricultural Research Service, Arthropod-Borne Animal Diseases Research Unit, 1515 College Ave, Manhattan, Kansas, 66502, United States of America.

## Abstract

1 SARS-CoV-2 is a recently emerged, highly contagious virus and the cause of the current  
2 pandemic. It is a zoonotic virus, although its animal origin is not clear yet. Person-to-person  
3 transmission occurs by inhalation of infected droplets and aerosols, or by direct contact with  
4 contaminated fomites. Arthropods transmit numerous viral, parasitic, and bacterial diseases;  
5 however, the potential role of arthropods in SARS-CoV-2 transmission is not fully understood.  
6 Thus far, a few studies have demonstrated that SARS-CoV-2 replication is not supported in cells  
7 from certain insect species nor in certain species of mosquitoes after intrathoracic inoculation. In  
8 this study, we expanded the work of SARS-CoV-2 susceptibility to biting insects after ingesting  
9 a SARS-CoV-2-infected blood meal. Species tested included *Culicoides sonorensis* biting  
10 midges, as well as *Culex tarsalis* and *Culex quinquefasciatus* mosquitoes, all known biological  
11 vectors for numerous RNA viruses. Arthropods were allowed to feed on SARS-CoV-2 spiked  
12 blood and at various time points post infection analyzed for the presence of viral RNA and  
13 infectious virus. Additionally, cell lines derived from *C. sonorensis* (W8a), *Ae. aegypti* (C6/36),  
14 *Cx. quinquefasciatus* (HSU), and *Cx. tarsalis* (CxTrR2) were tested for SARS-CoV-2  
15 susceptibility. Our results indicate that none of the biting insects, nor the insect cell lines support  
16 SARS-CoV-2 replication. We conclude, that biting insect do not pose a risk for transmission of  
17 SARS-CoV-2 to humans or animals following a SARS-CoV-2 infected blood meal.

18 **Keywords:** SARS-CoV-2, susceptibility, midges, mosquitoes

19

20

21

## Introduction

22 Severe acute respiratory syndrome coronavirus 2 (SARS-CoV-2) is the causative agent of the  
23 2019 coronavirus disease (COVID-19) pandemic. SARS-CoV-2 belongs to the order  
24 *Nidovirales*, family *coronaviridae*, and genus *betacoronavirus*. It is an enveloped virus with a  
25 positive-sense, single-stranded RNA genome of approximately 30 kb in length (Chen et al.  
26 2020). SARS-CoV-2 infects humans, and has the potential to infect various animal species (Chu  
27 et al. 2020). Transmission from these animals to humans is not yet clearly understood. The virus  
28 is mainly transmitted from person-to-person by inhalation of droplets and aerosols produced by  
29 infected people (Chan et al. 2020), or through contact with contaminated surfaces (Goldman  
30 2020, Sonja A. Rasmussen 2020; Kwon et al., 2020). Arthropods transmit numerous diseases to  
31 humans and animals via biological and mechanical transmission (Leitner et al. 2015). Although  
32 the SARS-CoV-2-related coronaviruses SARS-CoV-1 and MERS-CoV are not transmitted by  
33 insects, concerns have been raised, by those in both public health and agricultural sectors, as to  
34 their potential role in spreading SARS-CoV-2 among humans and animals. For arthropods to be  
35 transmission-competent vectors, the respective pathogen must be acquired from a host during  
36 blood feeding, then infect the midgut, escape the midgut barrier, disseminate to and infect the  
37 salivary glands, and finally be transmitted to a susceptible host during subsequent blood feeding  
38 (Franz et al. 2015). A recent report demonstrated that SARS-CoV-2 replication was not  
39 supported in *Aedes aegypti*, *Ae. albopictus* and *Culex quinquefasciatus* mosquito species after an  
40 intrathoracic route of infection (Huang et al. 2020). Another report showed that the SARS-CoV-  
41 2 does not replicate in cells derived from *Aedes* mosquitoes, nor was it present in field-caught  
42 *Culex* and *Anopheles* mosquitoes from Wuhan (Xia et al. 2020).

43 Here, we report the first susceptibility study of SARS-CoV-2 infection using three critical insect  
44 vectors following ingestion of a SARS-CoV-2 infected blood meal, including an agriculturally  
45 important animal disease vector, *Culicoides sonorensis* biting midges, and two significant human  
46 disease vector mosquito species, *Cx. tarsalis* and *Cx. quinquefasciatus*. Additionally, four insect-  
47 derived cell lines from *C. sonorensis* (W8a), *Ae. aegypti* (C6/36), *Cx. tarsalis* (CxTrR2), and *Cx.*  
48 *quinquefasciatus* (HSU) were also evaluated for SARS-CoV-2 susceptibility.

## Methods

49 The SARS-CoV-2 USA-WA1/2020 strain was acquired from Biodefense and Emerging  
50 Infection Research Resources Repository (BEI Resources, Manassas, VA, USA) and was  
51 passaged three times on VeroE6 cells (ATCC, VA, USA) with a final titer of  $2.5 \times 10^6$   
52 TCID<sub>50</sub>/ml. Arthropod cell cultures were derived from *C. sonorensis* embryos (W8a; McHolland  
53 and Mecham 2003), *Cx. tarsalis* embryos (CxTrR2; Arthropod-Borne Animal Diseases Unit;  
54 ABADRU, Manhattan, KS, USA), *Cx. quinquefasciatus* ovaries (HSU; Hsu et al. 1970), and *Ae.*  
55 *albopictus* larva (C6/36). The W8a, CxTrR2, HSU, and C6/36 cells were maintained in CuVa  
56 medium, L-15 medium (with 10% tryptose phosphate broth) and Medium 199H, respectively.  
57 All media (Sigma-Aldrich, St. Louis, MO, USA) was supplemented with 10-20% FBS (ITFBS;  
58 Sigma). Cells were maintained at 27°C in closed T-flasks and inoculated with SARS-CoV-2 at  
59 approximately 0.1 multiplicity of infection (MOI) for 1h before the inoculum was replaced with  
60 fresh culture media. Cell cultures were monitored for cytopathic effect (CPE) by light  
61 microscopy and culture supernatants were collected at 0, 2, 4, and 8 days post infection (dpi) for  
62 subsequent titration by TCID<sub>50</sub>-CPE assay on VeroE6 cells.

63 *Cx. tarsalis*, *Cx. quinquefasciatus*, and the ABADRU *C. sonorensis* colonies were reared and  
64 maintained in the ABADRU insectary. Arthropods were transported to Kansas State University,

65 Biosecurity Research Institute (BRI) for infection studies under Arthropod Containment Level-3  
66 (ACL-3) conditions.

67 Adult female *C. sonorensis* (n=200) midges were allowed to feed on defibrinated sheep blood  
68 mixed 1:1 (v/v) with SARS-CoV-2 ( $2.0 \times 10^6$  TCID<sub>50</sub>/ml). Negative control unfed midges  
69 (n=100) were maintained in adjacent cages. For mosquitoes, 8-day old *Cx. tarsalis* (n=100) or  
70 10-day old *Cx. quinquefasciatus* (n=100) were allowed to feed on SARS-CoV-2 spiked sheep  
71 blood as described above. Negative control mock-infected blood-fed *Cx. tarsalis* (n=50) were  
72 maintained in adjacent cages. After an hour of feeding, midges or fully engorged mosquitoes  
73 were held at 28°C for 10 days. Surviving midges and mosquitoes at day 10 were pooled (n=5-10)  
74 in 1 ml virus transport media (199E media supplemented with antibiotic-antimycotics; Sigma),  
75 and stored at -80°C until processed for virus isolation (VI) and RNA extractions.

76 Pooled arthropods were homogenized by a TissueLyser II (Qiagen, Germantown, MD, USA)  
77 using tungsten carbide beads (Qiagen). An aliquot (140 µl) of homogenate was used for RNA  
78 extraction with the remaining homogenate filtered through a 0.22 µm PES membrane filter  
79 (MIDSCI, St. Louis, MO, USA) before subsequent VI.

80 RNA extraction was performed using the QIAamp viral RNA mini kit (Qiagen) as per  
81 manufacturer's instructions. RT-qPCR assay was performed according to the Center for Disease  
82 Control (CDC) protocol for detection of SARS-CoV-2 nucleocapsid (N)-specific RNA  
83 (<https://www.fda.gov/media/134922/download>) using Script XLT One-Step RT-qPCR Tough  
84 Mix (Quanta Biosciences, Beverly, MA, USA) on a CFX96 Real-time thermocycler (BioRad,  
85 Hercules, CA, USA). Plate controls included a quantitated SARS-CoV-2 N-specific qPCR  
86 positive control, diluted 1:10 (Integrated DNA Technologies, IA, USA), and a non-template

87 control (NTC). Results were analyzed using the Bio-Rad CFX Manager 3.1 with samples below  
88 40 Ct considered positive.

89 Arthropod homogenates (100 µl) were added on to VeroE6 cells in 24 well plates and incubated  
90 at 37°C and 5% CO<sub>2</sub> for 3 days. Culture supernatants were blind-passaged three times on VeroE6  
91 cells, and at the first and third passage, cells were examined by an indirect immunofluorescence  
92 assay (IFA) for the presence of SARS-CoV-2 antigen. Briefly, 3 dpi cells were fixed with ice  
93 cold 100% methanol for 10 mins at -80°C and washed three times with 1 x PBS Tween 20  
94 (0.05%). Mouse monoclonal antibodies (in house) specific for the Receptor Binding Domain  
95 (RBD) of spike protein of SARS-CoV-2 was diluted 1:5 in 1x PBS containing 1% BSA and 150  
96 µl was added to each well and incubated at room temperature (RT) for 1 h. The cells were  
97 washed three times as described above, and then incubated with 150 µl of FITC-conjugated goat  
98 anti-mouse IgG (Abcam, Cambridge, MA, USA), diluted 1:500 in 1x PBS with BSA, for 1 h at  
99 RT. After washing and drying, cell monolayers were examined by an EVOS fluorescent  
100 microscope (ThermoFisher Scientific, Waltham, MA, USA) for the presence of FITC positive  
101 cells. Mock infected and SARS-CoV-2 infected VeroE6 cells were used as negative and positive  
102 controls, respectively.

## Results and discussion

103 The goal of this study was to determine whether arthropods are susceptible to SARS-CoV-2 by a  
104 natural route of infection which has not yet been evaluated. In addition to important mosquito  
105 vectors, *Culicoides* midges were also evaluated in this study. Initial infection studies were  
106 performed *in vitro* with the insect cell lines W8a, C6/36, CxTrR2, and HSU. Two independent  
107 experiments showed no obvious sign of CPE for any of the SARS-CoV-2-infected arthropod-

108 derived cell cultures, nor for any of the insect culture supernatants collected at 2, 4 or 8 dpi and  
109 passaged on VeroE6 cells.

110 Next, susceptibility of insects after an infectious blood meal was investigated. Of 200 midges  
111 allowed to feed on the SARS-CoV-2-spiked blood meal, 140 survived until 10 days post blood  
112 meal and were further analyzed. The majority (85%) of virus-fed midge pools had detectable  
113 SARS-CoV-2-specific RNA with an average Ct value of  $34.84 \pm 2.6$ ; the day 10 control unfed  
114 midges were negative for SARS-CoV-2 RNA (Table 1). Among the *Cx. tarsalis* mosquitoes  
115 allowed to feed on SARS-CoV-2-spiked blood (n=100), only 48 virus-fed mosquitoes survived  
116 until day 10. One out of 6 (17%) virus-fed *Cx. tarsalis* mosquitoes had detectable SARS-CoV-2-  
117 specific RNA with an average Ct value of 31.3, and none of the 30 mock-infected blood-fed *Cx.*  
118 *tarsalis* mosquitoes were SARS-CoV-2 RNA positive (Table 1). Similarly, of 100 *Cx.*  
119 *quinquefasciatus* mosquitoes, 47 virus-fed survived until day 10. Viral RNA was detected in  
120 50% of the SARS-CoV-2-fed mosquitoes with an average Ct value of 34.17 (Table 1).

121 To determine the presence of infectious virus, serial passages of pooled arthropod homogenates  
122 were performed on VeroE6 cells. No CPE was observed after three passages of virus-fed  
123 *Culicoides* midge homogenates, and IFA analysis of passage one and three of inoculated VeroE6  
124 cells confirmed the absence of SARS-CoV-2 (Table 2; Figure 1). SARS-CoV-2-infected VeroE6  
125 cells were used as an IFA positive control and showed a clear positive staining pattern (Fig.1).  
126 Unfed control midge samples were negative by VI and IFA (Table 2). Similarly, no infectious  
127 virus was detected from any of the six homogenate pools of SARS-CoV-2-fed *Cx. tarsalis*  
128 mosquitoes that were passaged on VeroE6 cells and analyzed for CPE and by IFA; the control  
129 *Cx. tarsalis* homogenate pools were also negative by both methods (Table 2). The six virus-fed

130 *Cx. quinquefasciatus* mosquito homogenates tested for infectivity by VI and IFA were also  
131 negative for SARS-CoV-2 (Table 2).

132 A key factor crucial for arthropod-mediated transmission is that the infected host, either person  
133 or animal, is viremic at the time of feeding. Thus far, SARS-CoV-2 is known to cause viremia in  
134 some cases of infected people (Young et al. 2020). Susceptible animal models tested so far  
135 appear to be aviremic (Shi et al. 2020) except for hamsters which regularly show viremia (Chan  
136 et al. 2019). Therefore, controlled studies to rule out arthropod transmission of this RNA virus  
137 are critical for determining risk, as well as developing accurate epidemiological modeling and  
138 control strategies.

139 Overall, our results agree with previously published findings that *Aedes* mosquito derived cells  
140 do not support SARS-CoV-2 replication (Xia et al. 2020). Additionally, we have shown that two  
141 different *Culex* species derived cell lines and one *Culicoides* midge derived cell line are also  
142 refractory to SARS-CoV-2 infection. In a previously published SARS-CoV-2 susceptibility  
143 study in mosquitoes, intrathoracic injection of SARS-CoV-2 grown in Vero76 was used to  
144 determine the susceptibility of *Ae. aegypti*, *Ae. Albopictus*, and *Cx. quinquefasciatus* to the virus  
145 (Huang et al. 2020); however, intrathoracic inoculation bypasses the natural route of infection  
146 via the ingestion of a virus-infected blood meal (Franz et al. 2015). Therefore, in the present  
147 study, testing of arthropods for SARS-CoV-2 susceptibility was performed following the  
148 ingestion of a virus-spiked blood meal; this is important not only because it is the most relevant  
149 route of infection for arthropod vectors, but also because of the quasi-species nature of an RNA  
150 virus inoculum such as for SARS-CoV-2 (Jary et al. 2020). Considerable genetic bottle necks  
151 and natural selection processes exist for viruses in arthropod replication and arthropod-borne  
152 transmission. Depending on the insect vector, the number of virus particles ingested via a blood



153 meal depends on the level of viremia in the host and the volume of the meal. When virus  
154 particles ingested via the blood meal enter the midgut, few will be able to infect the midgut  
155 epithelium. After midgut replication, progeny viruses escape the midgut barrier and disseminate  
156 in the insect's hemocoel, and then next they infect and replicate in the salivary gland. This is  
157 critical for subsequent virus transmission to a susceptible host during a blood meal. The quasi-  
158 species nature of RNA viruses combined with the natural selection for defined viral genotypes  
159 enables RNA viruses to infect and replicate in arthropods and results in a defined virus  
160 population selected for increased fitness for the arthropod environment. These viral genotypic  
161 changes could lead to viral biotypes with a higher ability of salivary gland infection and bite  
162 transmission, when compared to a virus which is artificially injected into the insect's hemocoel.

163 Our *in vitro* and *in vivo* studies of midge and mosquito susceptibility to SARS-CoV-2 infection  
164 following a natural ingestion route of exposure showed that viral RNA remained in virus-fed  
165 arthropods for up to 10 days post virus-spiked blood feeding. However, no infectious virus was  
166 recovered from these RNA-positive arthropods, even after three passages on highly susceptible  
167 VeroE6 cells. Our *in vitro* studies using various insect cells support these results since no  
168 infectious virus was detected in supernatants of SARS-CoV-2 inoculated insect cell cultures. In  
169 conclusion, the insect vector species known to transmit animal and human pathogens used in this  
170 study are refractory to SARS-CoV-2 infection under experimental conditions and, therefore,  
171 most likely do not play a role in transmission of SARS-CoV-2.

## 172 **Acknowledgments**

173 We gratefully thank the staff of KSU Biosecurity Research Institute. The following reagent was  
174 obtained through BEI Resources, National Institute of Allergy and Infectious Diseases (NIAID),  
175 National Institutes of Health (NIH): SARS-CoV-2 Virus strain USA-WA1/2020 (catalogue #

176 NR-52281). C6/36 cells were kindly provided by Robert B Tesh, UTMB, Galveston, TX.*Cx.*

177 *tarsalis* and *Cx. quinquefasciatus* colonies were kindly provided by Chris Barker and O.

178 Winokur, University of California-Davis.

179 **Conflict of interest**

180 All the authors declare no conflict of interest.

181 **Disclaimer**

182 The conclusions in this report are those of the author and do not necessarily represent the views  
183 of the United States Department of Agriculture.

184 **Funding**

185 Funding for this study was in part by the United States Department of Agriculture (BSD, DM,  
186 DS, JO, DCJ, LN, and WCW) and through grants from NBAF Transition Funds and KSU  
187 internal funds to JAR. This study was also partially supported by NIAID Centers of Excellence  
188 for Influenza Research and Surveillance (CEIRS; contract #HHSN 272201400006C), and the  
189 Department of Homeland Security Center of Excellence for Emerging and Zoonotic Animal  
190 Diseases (grant #2010-ST061-AG0001) to JAR.

## References

- 191
- 192 **Chan, J. F. W., S. Yuan, K. H. Kok, K. K. W. To, H. Chu, J. Yang, F. Xing, J. Liu, C. C. Y.**  
193 **Yip, R. W. S. Poon, H. W. Tsoi, S. K. F. Lo, K. H. Chan, V. K. M. Poon, W. M. Chan,**  
194 **J. D. Ip, J. P. Cai, V. C. C. Cheng, H. Chen, C. K. M. Hui, and K. Y. Yuen. 2020.** A  
195 familial cluster of pneumonia associated with the 2019 novel coronavirus indicating person-  
196 to-person transmission: a study of a family cluster. *Lancet*. 395: 514–523.
- 197 **Chan, J. F., A. J. Zhang, S. Yuan, and V. Kwok-. 2019.** Title: Simulation of the clinical and  
198 pathological manifestations of Coronavirus Disease 2019 (COVID-19) in golden Syrian  
199 hamster model: implications for disease pathogenesis and transmissibility Authors: Jasper  
200 Fuk-Woo Chan. *Clin Infect Dis*. 2019: 1–50.
- 201 **Chen, Y., Q. Liu, and D. Guo. 2020.** Emerging coronaviruses: Genome structure, replication,  
202 and pathogenesis. *J. Med. Virol*. 92: 418–423.
- 203 **Chu, H., J. F.-W. Chan, T. T.-T. Yuen, H. Shuai, S. Yuan, Y. Wang, B. Hu, C. C.-Y. Yip, J.**  
204 **O.-L. Tsang, X. Huang, Y. Chai, D. Yang, Y. Hou, K. K.-H. Chik, X. Zhang, A. Y.-F.**  
205 **Fung, H.-W. Tsoi, J.-P. Cai, W.-M. Chan, J. D. Ip, A. W.-H. Chu, J. Zhou, D. C. Lung,**  
206 **K.-H. Kok, K. K.-W. To, O. T.-Y. Tsang, K.-H. Chan, and K.-Y. Yuen. 2020.**  
207 Comparative tropism, replication kinetics, and cell damage profiling of SARS-CoV-2 and  
208 SARS-CoV with implications for clinical manifestations, transmissibility, and laboratory  
209 studies of COVID-19: an observational study. *The Lancet Microbe*. 1: e14–e23.
- 210 **Franz, A. W. E., A. M. Kantor, A. L. Passarelli, and R. J. Clem. 2015.** Tissue barriers to  
211 arbovirus infection in mosquitoes. *Viruses*. 7: 3741–3767.
- 212 **Goldman, E. 2020.** Exaggerated risk of transmission of COVID-19 by fomites. *Lancet Infect.*  
213 *Dis*. 20: 892–893.
- 214 **Hsu, S. H., W. H. Mao, and J. H. Cross. 1970.** Establishment of a Line of Cells Derived from  
215 Ovarian Tissue of *Culex Quinquefasciatus* Say1. *J. Med. Entomol*. 7: 703–707.
- 216 **Huang, Y. J. S., D. L. Vanlandingham, A. N. Bilyeu, H. M. Sharp, S. M. Hettenbach, and S.**  
217 **Higgs. 2020.** SARS-CoV-2 failure to infect or replicate in mosquitoes: an extreme  
218 challenge. *Sci. Rep*. 10: 1–4.
- 219 **Jary, A., V. Leducq, I. Malet, S. Marot, E. Klement-Frutos, E. Teyssou, C. Soulié, B. Abdi,**  
220 **M. Wirden, V. Pourcher, E. Caumes, V. Calvez, S. Burrel, A.-G. Marcelin, and D.**  
221 **Boutolleau. 2020.** Evolution of viral quasispecies during SARS-CoV-2 infection. *Clin.*  
222 *Microbiol. Infect*.
- 223 **Leitner, W. W., T. Wali, R. Kincaid, and A. Costero-Saint Denis. 2015.** Arthropod Vectors  
224 and Disease Transmission: Translational Aspects. *PLoS Negl. Trop. Dis*. 9: 1–11.
- 225 **Main, B. J., J. Nicholson, O. C. Winokur, C. Steiner, K. K. Riemersma, J. Stuart, R.**  
226 **Takeshita, M. Krasnec, C. M. Barker, and L. L. Coffey. 2018.** Vector competence of  
227 *Aedes aegypti*, *Culex tarsalis*, and *Culex quinquefasciatus* from California for Zika virus.  
228 *PLoS Negl. Trop. Dis*. 12: 1–13.

- 229 **McHolland, L. E., and J. O. Mecham. 2003.** Characterization of cell lines developed from field  
230 populations of *Culicoides sonorensis* (Diptera: Ceratopogonidae). *J. Med. Entomol.* 40:  
231 348–351.
- 232 **Shi, J., Z. Wen, G. Zhong, H. Yang, C. Wang, B. Huang, R. Liu, X. He, L. Shuai, Z. Sun, Y.**  
233 **Zhao, P. Liu, L. Liang, P. Cui, J. Wang, X. Zhang, Y. Guan, W. Tan, G. Wu, H. Chen,**  
234 **Z. Bu, and Z. Bu. 2020.** Susceptibility of ferrets, cats, dogs, and other domesticated  
235 animals to SARS-coronavirus 2. *Science* (80-. ). 368: 1016–1020.
- 236 **Sonja A. Rasmussen, MD, MS, J. C. S. 2020.** Since January 2020 Elsevier has created a  
237 COVID-19 resource centre with free information in English and Mandarin on the novel  
238 coronavirus COVID-. *Ann Oncol.* 19–21.
- 239 **Kwon, T., Gaudreault, N. N, and Richt, J. A. 2020.** Environmental stability of SARS-CoV-2  
240 on different types of surfaces under indoor and seasonal climate conditions. *bioRxiv.*
- 241 **Xia, H., E. Atoni, L. Zhao, N. Ren, D. Huang, R. Pei, Z. Chen, J. Xiong, R. Nyaruaba, S.**  
242 **Xiao, B. Zhang, and Z. Yuan. 2020.** SARS-CoV-2 Does Not Replicate in *Aedes* Mosquito  
243 Cells nor Present in Field-Caught Mosquitoes from Wuhan. *Viol. Sin.* 35: 355–358.
- 244 **Young, B. E., S. W. X. Ong, S. Kalimuddin, J. G. Low, S. Y. Tan, J. Loh, O. T. Ng, K.**  
245 **Marimuthu, L. W. Ang, T. M. Mak, S. K. Lau, D. E. Anderson, K. S. Chan, T. Y. Tan,**  
246 **T. Y. Ng, L. Cui, Z. Said, L. Kurupatham, M. I. C. Chen, M. Chan, S. Vasoo, L. F.**  
247 **Wang, B. H. Tan, R. T. P. Lin, V. J. M. Lee, Y. S. Leo, and D. C. Lye. 2020.**  
248 Epidemiologic Features and Clinical Course of Patients Infected with SARS-CoV-2 in  
249 Singapore. *JAMA - J. Am. Med. Assoc.* 323: 1488–1494.
- 250 **Zhu, N., D. Zhang, W. Wang, X. Li, B. Yang, J. Song, X. Zhao, B. Huang, W. Shi, R. Lu, P.**  
251 **Niu, F. Zhan, X. Ma, D. Wang, W. Xu, G. Wu, G. F. Gao, and W. Tan. 2020.** A novel  
252 coronavirus from patients with pneumonia in China, 2019. *N. Engl. J. Med.* 382: 727–733.

**Table 1:** Detection of SARS-CoV-2 viral RNA in various arthropods by RT-qPCR

| Treatment Group                            | Positive homogenate pools out of total (% positive) | Mean Ct $\pm$ SD |
|--------------------------------------------|-----------------------------------------------------|------------------|
| Unfed <i>C. sonorensis</i>                 | 0/4 (0)                                             | ND*              |
| SARS-CoV-2 fed <i>C. sonorensis</i>        | 12/14 (85)                                          | 34.84 $\pm$ 2.6  |
| Mock-infected fed <i>Cx. tarsalis</i>      | 0/3 (0)                                             | ND*              |
| SARS-CoV-2 fed <i>Cx. tarsalis</i>         | 1/6 (17)                                            | 31.3             |
| SARS-CoV-2 fed <i>Cx. quinquefasciatus</i> | 3/6 (50)                                            | 34.17 $\pm$ 3.3  |

\*ND=not detected

**Table 2:** Detection of infectious SARS-CoV-2 in arthropod homogenate pools on VeroE6 cells by virus isolation and an indirect immunofluorescence assay

| Species                     | Control arthropods |                     | SARS-CoV-2 fed arthropods |                     |
|-----------------------------|--------------------|---------------------|---------------------------|---------------------|
|                             | VI<br>(positive/N) | IFA<br>(positive/N) | VI<br>(positive/N)        | IFA<br>(positive/N) |
| <i>C. sonorensis</i>        | 0/4                | 0/4                 | 0/14                      | 0/14                |
| <i>Cx. tarsalis</i>         | 0/3                | 0/3                 | 0/6                       | 0/6                 |
| <i>Cx. quinquefasciatus</i> | N/A                | N/A                 | 0/6                       | 0/6                 |

N= total number of day 10 homogenate pools. 0= no virus positive or FITC positive cell cultures; N/A = not tested

**Fig. 1.**

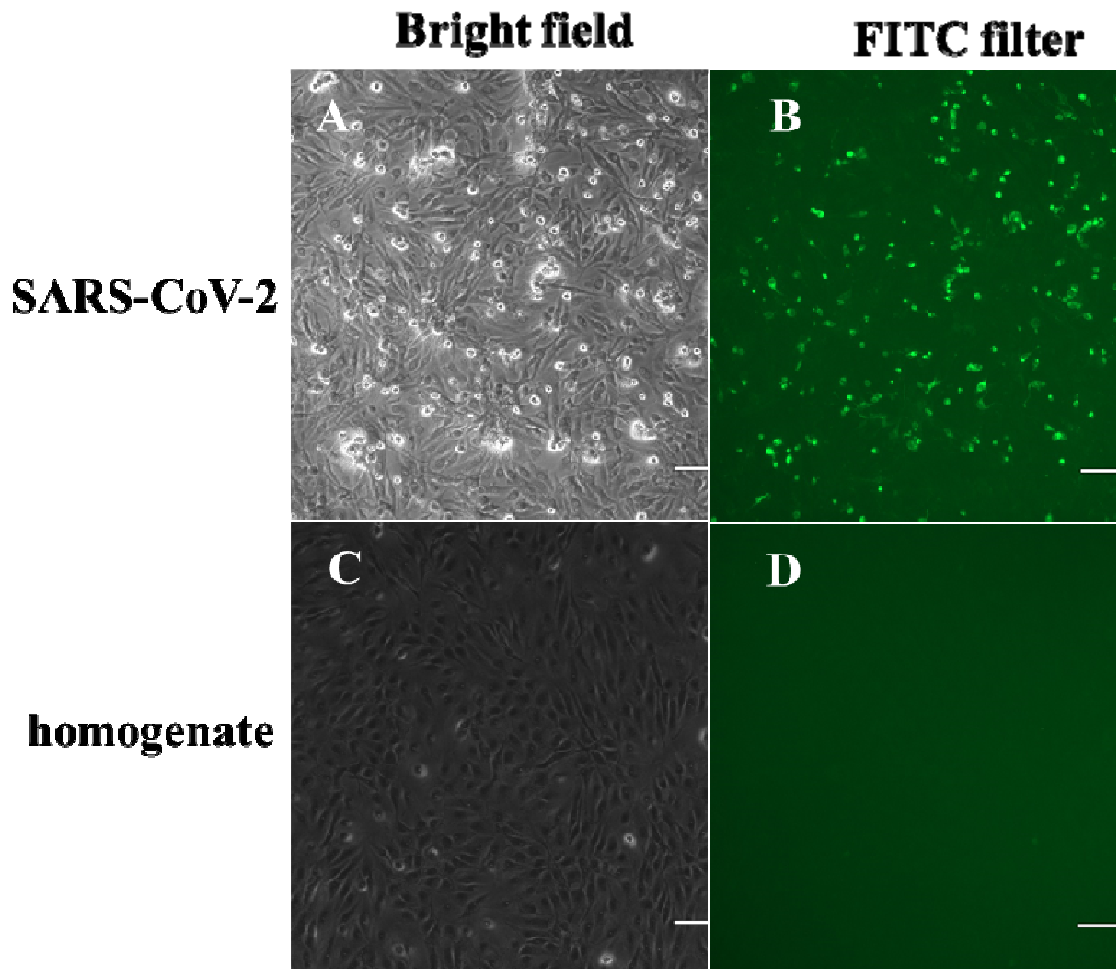

Figure 1. Indirect immunofluorescence assay for the detection of SARS-CoV-2 infected cells. SARS-CoV-2 and a representative passage 3 arthropod homogenate were incubated 3 days on VeroE6 cells. A) Bright field; B) Positive SARS-CoV-2 infected VeroE6 cells (positive control cells); and C) Bright field; D) VeroE6 cells inoculated with passage three of a RT-qPCR+ *Culicoides sonorensis* day 10 homogenate. (Magnification 10x)
